## BODY WEIGHT AND THE ENERGETICS OF TEMPERATURE REGULATION

By BRIAN K. McNAB

*Department of Zoology, University of Florida,  
 Gainesville, Florida 32601*

(Received 10 April 1970)

### INTRODUCTION

The recent rebirth of interest in the 200-year-old field of homoiothermic energetics may be dated from three papers published in 1950 by Scholander, Irving and colleagues. These papers furnished many data and a theoretical analysis of the energetics of temperature regulation in tropical and arctic birds and mammals. A massive body of data has since become available through the efforts of many workers. Unfortunately, there has been little effort to extend Scholander and Irving's model (which was based on Newton's law of cooling) to meet the challenge of new data. One of the peculiarities of this model is that it is presented in a weight-independent form, although two of its parameters, basal rate of metabolism and thermal conductance, are well-known to be weight-dependent.

In this paper the influence of weight on the energetics of homoiotherms will be re-examined; special attention will be given to the applicability of Newton's law of cooling.

### NEWTON'S LAW OF COOLING

Since Newton's law of cooling will be the analytical basis for the discussion in this paper, it is first necessary to understand what it says and to know the limitations that are imposed upon it. As originally formulated Newton's law states that the rate at which the temperature of a body falls is proportional to the difference in temperature between the body and the environment:  $dT_b/dt = \phi(T_b - T_a)$ , where  $\phi$  is a cooling constant (see the Table of Symbols for all definitions and units). But a fall in temperature can be related to a loss of heat, since  $\Delta T_b = \Delta Q/s.W$ . Therefore,

$$\begin{aligned} dQ/dt &= s.W.\phi(T_b - T_a) \\ &= C(T_b - T_a) \end{aligned} \quad (1)$$

which is the form of Newton's law to be used in this paper.

Equation (1) indicates that the net heat loss from an object warmer than its surroundings is proportional to the temperature differential between the object and its environment. A proportionality constant  $C$  (usually referred to as thermal conductance, but maybe more properly called the coefficient of heat transfer) is defined such that  $C(T_b - T_a)$  is equal to the rate of heat loss (not  $C$ , as erroneously stated by me, 1966*a, b*). If an animal regulates its temperature perfectly,  $T_b$  is constant and the rate of metabolism equals  $C(T_b - T_a)$  when there is no thermal source for regulation other than metabolism.

Two aspects of this relationship must be kept always in mind: (1)  $C(T_b - T_a)$  is an approximation of the summed heat loss by a warm animal to a cool environment, and (2) there are biological limits placed on this approximation. Each of these conditions must be examined briefly to avoid any misunderstandings.

Newton's law of cooling is an approximation to the sum of the amounts of heat lost by radiation, convection, conduction, and evaporation, respectively

$$M = \epsilon \sigma A_1 (T_b^4 - T_a^4) + h A_2 (T_b - T_a) + k A_3 (T_b - T_a) + L A_4 w. \quad (2)$$

One might therefore argue that it would be best to represent the rate of metabolism of an endotherm by equation (2). There are two reasons why this is not usually done. (1) It is an unnecessarily complex statement as shown by the rather simple linear relationship usually existing between the rate of metabolism and the temperature differential (e.g. Tucker, 1965), if for no other reason than that the biological variability of intact animals is sufficiently great to obscure the mathematical intricacies of the theoretically rigorous statement. (2) Equation (2) is difficult to apply because of the variable nature of the effective surface areas in each term and because of the complexities of the convective constant. Although Newton's law is a rough approximation of heat loss, the uncertainties in the application of equation (2) are sufficient to deny it a practical advantage in spite of its theoretical security.

Newton's law of cooling can be derived from equation (2). Note that  $(T_b^4 - T_a^4)$  is approximately equal to  $4T_a^3(T_b - T_a)$  when  $T_b - T_a$  is small, as is the case in biological systems. Therefore,

$$\begin{aligned} M &= (\epsilon \sigma A_1 4T_a^3 + h A_2 + k A_3) (T_b - T_a) + L A_4 w \\ &= c_1 (T_b - T_a) + L A_4 w. \end{aligned} \quad (3)$$

(When temperature is incorporated into the term for radiation as either  $T^3$  or  $T^4$ , it must be in  $^{\circ}\text{K}$ , but when a temperature differential is used either  $^{\circ}\text{C}$  or  $^{\circ}\text{K}$  may be used.) Equation (3) is applicable over all biologically relevant temperatures. It has two terms, one for heat loss based on a temperature differential and the other for evaporative heat loss. Biologically meaningful measurements of both oxygen consumption (metabolism) and evaporative water loss are difficult to make simultaneously (Lasiewski, Acosta & Bernstein, 1966). There is value, then, in a still simpler formulation when it is not practicable to measure evaporative water loss. This simplification can be made because the amount of heat lost by the evaporation of water at moderate to low environmental temperatures is a small, rather constant fraction of the total heat loss (e.g. Schmidt-Nielsen *et al.* 1965; Calder & Schmidt-Nielsen, 1967). Equation (3) therefore may be rewritten

$$M = (c_1 + c_2) (T_b - T_a) = C(T_b - T_a) \quad (4)$$

which, again, is Newton's law of cooling.

Newton's law of cooling, as represented in equations (1) and (4), resembles the Fourier equation for heat exchange with two exceptions. (1) A core temperature is used in Newton's law, which is justified by being easier to measure and by the fact that most of the temperature gradient between an endotherm and its environment exists between the surface and the environment (Porter & Gates, 1969), so that a surface temperature can be replaced by a core temperature with little error, except in animals that are both large and naked. (2) The surface area is not generally used in Newton's

law. The units for thermal conductance in this paper are cal/g-h °C (or equivalent). It has been argued that these units are not appropriate because heat loss occurs per unit of surface area, not per unit of weight. There is no question that the surface area is an important parameter of heat loss, but it is nearly impossible to measure the effective area, since it may be modified by postural changes and by changes in conductivity brought about by local vasoconstriction and vasodilation. Faced with this difficulty some observers advocate that surface area measurements be replaced by (constant) $W^{0.67}$ . But surely it is better to use the simpler weight-specific units for conductance than to calculate a pseudo surface-specific conductance.

There are biological limits to the application of Newton's law. It is an appropriate expression only at cooler ambient temperatures, since the evaporative heat loss (which does not depend upon a temperature differential) becomes the predominate means of heat dissipation at higher temperatures. Another complication derives from the behaviour of  $C$ . As the ambient temperatures fall from moderate values,  $C$  gradually decreases to a minimal value. Any further fall in  $T_a$  requires an increase in heat production by the animal to maintain a constant body temperature. The ambient temperature above which changes in  $C$  are the major means of thermal adjustment to a varying  $T_a$  and below which changes in  $M$  predominate is called the lower limit of thermoneutrality ( $T_l$ ). If the separation between the temperatures at which changes in  $C$  or  $M$  are used is sharp, the curve of metabolism on  $T_a$  below  $T_l$  has a slope equal to  $C$  and extrapolates to  $T_b$  when  $M = 0$ . But if an animal does not rigidly distinguish between 'physical' and 'chemical' regulation,  $C$  will decrease and  $M$  will increase with a fall in ambient temperature. As a result the slope of the curve of  $M$  on  $T_a$  below  $T_l$  is not equal to  $C$  and the curve extrapolates to a temperature greater than  $T_b$  when  $M = 0$ . Contrary to the opinion of some authors, this result does not invalidate the application of Newton's law to the heat exchange of homoiotherms, since this law is simply a mathematical approximation of the physics of heat exchange and *per se* does not incorporate any biological features, except for the dependence upon non-evaporative heat loss.

The two major criticisms of Newton's law, then, are that it is either physically too simple or that it is biologically inappropriate. But as long as the Newtonian simplification is used within its proper limits, e.g. at ambient temperatures below the mid-point of thermoneutrality, its great mathematical convenience can be profitably employed.

#### THE ENERGETICS OF MAMMALIAN THERMOREGULATION

Homoiotherms accommodate their energetics to unique environments mainly through a modification of thermal conductance and the basal rate of metabolism,  $M_b$  (McNab, 1966*b*). Since both parameters vary as a function of weight, species that differ greatly in weight may be compared if  $M_b$  and  $C$  are expressed relative to the values expected by weight from some 'standard', such as the curves of Kleiber (1960) for  $M_b$  and Herreid and Kessel (1967) for  $C$ . This transformation demonstrates that much of the observed variation in the level of  $T_b$  is due to relative variation in the basal rate and thermal conductance. The reason for this influence may be seen from rearranging Newton's law:  $T_b = M/C + T_a$ . Thus,  $T_b$  increases with an increase in the ratio  $M/C$ , which becomes  $M_b/C$ , when evaluated at the lower limit of thermoneutrality.

What is the physical basis for the influence of  $M_b/C$  on  $T_b$ ? This ratio is a measure of the temperature differential between a homoiotherm and the environment at the lower limit of thermoneutrality. Although temperature determines the rate of chemical reaction, the rate of chemical reaction may also determine the temperature of the system. Consider a furnace having a steady-state temperature distribution and consuming coal at a fixed rate. If the amount of coal fed to the furnace is increased, the rate of combustion will increase (assuming no other limiting factors) and the temperature of the furnace will rise to a new steady-state distribution, the level of which is

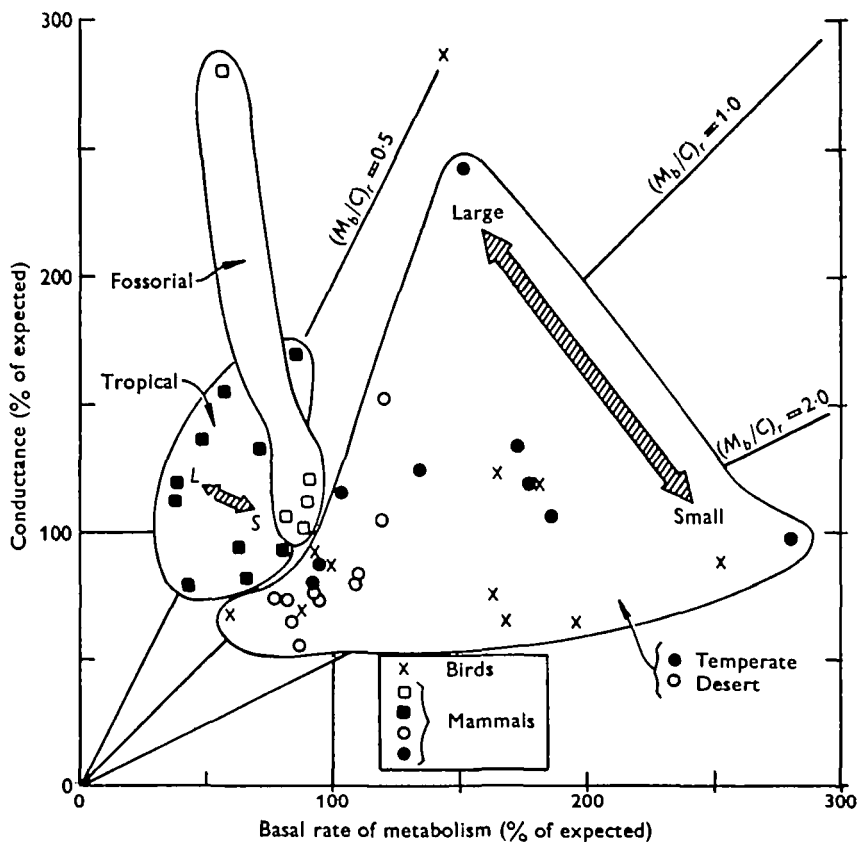

Fig. 1. Thermal conductance in mammals and birds as a function of the basal rate of metabolism (data from Tables 1 and 3). Each parameter is expressed as a percentage of the values expected from weight in mammals (see the text).

dictated by the temperature differential needed to dissipate the heat produced by the furnace. Endotherms can be compared to small furnaces, their temperatures determined, in part, by the proportionality existing between the rate of heat production and the temperature differential.

The biological significance of variations in the ratio  $M_b/C$  may be seen in Fig. 1. Temperate species generally have higher basal rates of metabolism than expected from weight, but they have only a modest increase, if any, in conductance (unless they are very large). The ratio  $M_b/C$  in these species tends, then, to be higher than expected

from weight, a condition that leads to the high, precisely regulated body temperatures typical of species living in a thermally unstable environment. Temperate species that live in deserts have a low  $M_b$  (to minimize water exchange) and in compensation have a low conductance. Fossorial rodents have both low basal rates and high conductances to reduce the threat of overheating in closed burrows. Tropical mammals also have low basal rates and high conductances, but like fossorial mammals, can tolerate the resulting low body temperatures by living in environments characterized by thermal stability.

Recent data on tropical bats (McNab, 1969) have shown that body weight also influences the level of  $T_b$  (contrary to the conclusion of Morrison & Ryser, 1952, but

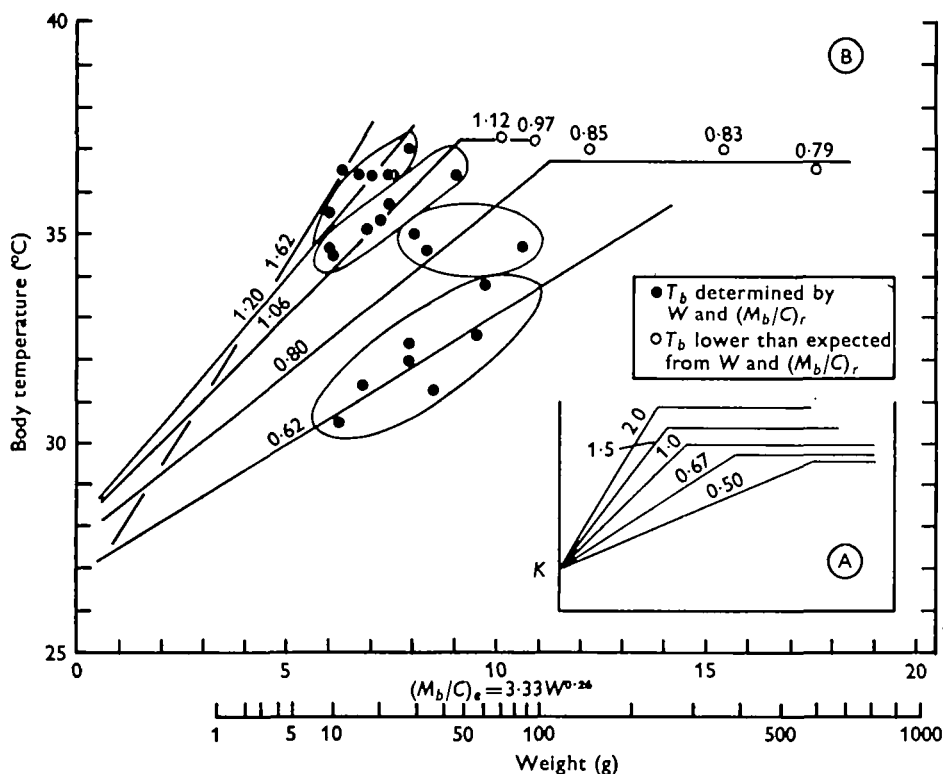

Fig. 2. A. The relation between  $T_b$ ,  $(M_b/C)_r$ , and  $(M_b/C)_e$  expected from equation (5). B. Body temperature in bats as a function of the ratios  $(M_b/C)_r$  and  $(M_b/C)_e$  (data from McNab, 1969). Values for  $(M_b/C)_r$  indicated for each hollow point.

in agreement with Rodbard, 1950). If it is recalled that the absolute values of  $M_b$  and  $C$  are weight-dependent, the possibility arises that the level of body temperature is determined by the weight-dependent relationships of  $M_b$  and  $C$ , as well as the extent to which actual values conform to these expectations. Thus, the measured ratio  $M_b/C$  may be represented by the product  $(M_b/C)_r(M_b/C)_e$ , where the expected ratio  $(M_b/C)_e = (3.4W^{-0.25})/(1.02W^{-0.51}) = 3.33W^{0.26}$  (McNab, 1966b; Herreid & Kessel, 1967) and the relative ratio  $(M_b/C)_r$  is the dimensionless fraction: (measured ratio)/(expected ratio) =  $(M_b/C)/(M_b/C)_e$ . The relative ratio is identical to that described in previous analyses (McNab, 1966b, 1969).

Applying this analysis to Newton's law of cooling and rearranging

$$T_b = (M_b/C)_r (M_b/C)_e + K \tag{5a}$$

$$= 3.33 (M_b/C)_r W^{0.26} + K. \tag{5b}$$

If this suggestion for the weight-dependency of body temperature is correct, a plot of body temperature against  $3.33W^{0.26}$  should give a family of linear curves, the slopes of which are equal to  $(M_b/C)_r$  (see Fig. 2A). Such curves are plotted in Fig. 2B for bats and in Fig. 3 for other mammals. The expectation holds in both cases:  $T_b$  depends

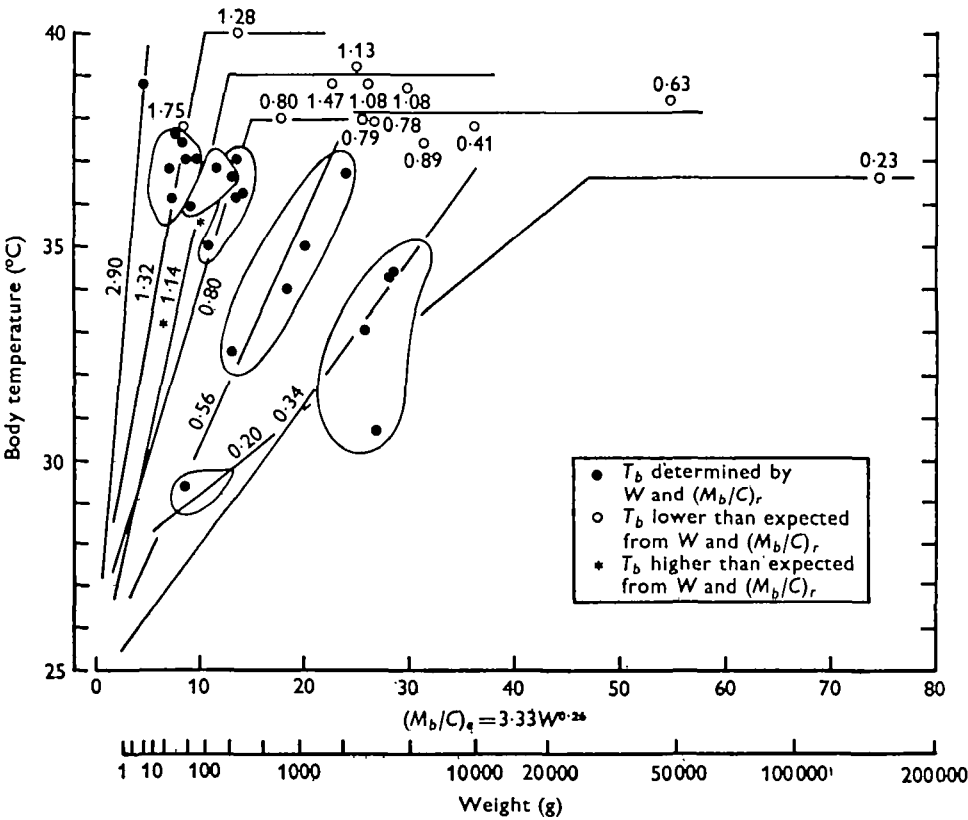

Fig. 3. Body temperature in mammals other than bats as a function of the ratios  $(M_b/C)_r$  and  $(M_b/C)_e$  (data from Table 1). Values for  $(M_b/C)_r$  indicated for each hollow point.

upon the ratio  $(M_b/C)_e$  up to 37 or 38 °C. (beyond which  $T_b$  is nearly constant). Moreover, body temperature varies with the ratio  $(M_b/C)_r$  at a constant weight in a manner expected from equation (5). A similar dependency of  $T_b$  on  $M_b$ ,  $C$  and  $W$  can be seen in the data of MacMillen & Nelson (1969) on marsupials. Equation (5), then, is simply Newton's law rewritten in a form that permits the influence of body weight on  $T_b$  to appear. The precision of regulation and the sensitivity of  $T_b$  to variations in  $T_a$  are also compatible with this analysis (McNab, 1969).

The weight at which body temperature shifts from being  $(M_b/C)_e$  dependent to being  $(M_b/C)_r$  independent may be called the 'critical' weight. This weight varies

with the ratio  $(M_b/C)_r$  in a manner such that a high relative ratio may compensate for a small weight in the maintenance of a high temperature (Fig. 4). The equation for this relationship is

$$\begin{aligned}(M_b/C)_r &= 11.5(M_b/C)_e \\ &= 3.45W^{-0.28}\end{aligned}\quad (6)$$

whether obtained by extrapolating the curves in Figs. 2B and 3 to a common body temperature ( $38^\circ\text{C}$ ), or by taking the critical weights from the  $(M_b/C)_r$  constant curves in these figures. A similar equation is obtained from equation (5a) by substituting  $T_b = 38^\circ\text{C}$  and  $T_l = 27^\circ\text{C}$  (the mean  $T_l$  for all mammals in Table 1).

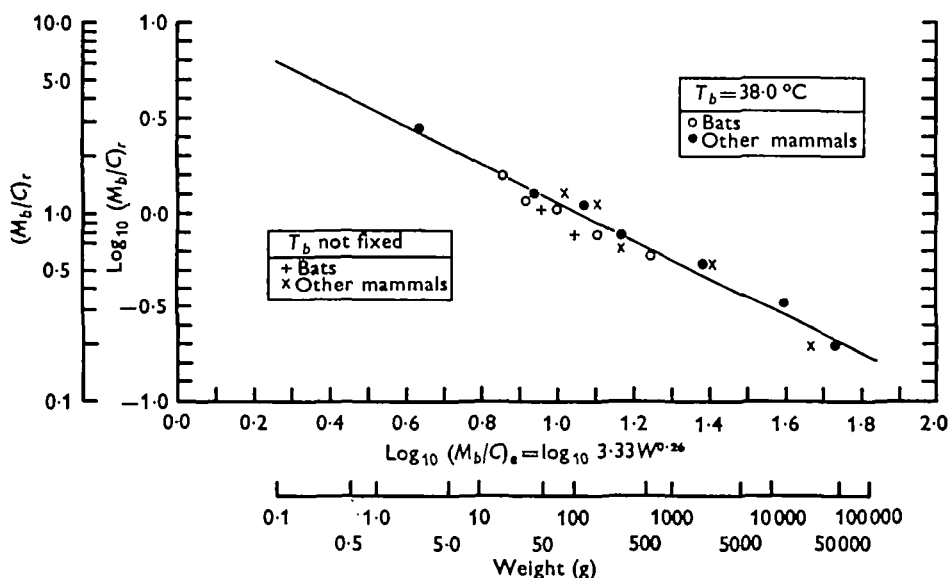

Fig. 4. The relation between  $(M_b/C)_r$  and  $(M_b/C)_e$  in mammals either at a fixed temperature or at the point beyond which  $T_b$  no longer depends upon  $(M_b/C)_e$ . The data were taken from Figs. 2 and 3.

A 'critical' weight results from the mathematical form of equation (5) and from the setting of a maximal  $T_b$ . Mammalian temperatures seem set near  $38^\circ\text{C}$ , all deviations being due either to a small weight or to deviations from the 'standard' curves of metabolism and conductance on weight.

A high, precisely regulated temperature, therefore, can be attained at any weight, provided that an appropriate energy expenditure, relative to conductance and weight, is made. The exact balance differs somewhat among mammals, but it has a consistent pattern: to regulate temperature precisely a species weighing 10 kg must have the ratio  $(M_b/C)_r$  equal to or greater than 0.3, one weighing 500 g (in bats about 250 g) must have a ratio equal to 0.7, and one weighing 100 g (in bats 70 g) must have a ratio equal to 1.0.

A very small species must pay a high price for a high  $T_b$ . Morrison, Ryser & Dawe (1959) have shown that a common shrew, *Sorex cinereus*, even though weighing only 3.3 g, maintains a temperature of  $39^\circ\text{C}$  by having  $(M_b/C)_r$  equal to about 2.9 (assuming

Table 1. *The energetics of mammals*

| Species                         | Weight<br>(g) | $(M_b/C)^*$ | Basal metabolism           |     | Conductance                   |     | $T_b$<br>(°C) | $T_{ill}$<br>(°C) | References <sup>†</sup>                              |
|---------------------------------|---------------|-------------|----------------------------|-----|-------------------------------|-----|---------------|-------------------|------------------------------------------------------|
|                                 |               |             | (c.c. O <sub>2</sub> /g-h) | %†  | (c.c. O <sub>2</sub> /g-h °C) | %†  |               |                   |                                                      |
| <i>Tachyglossus aculeatus</i>   | 3000          | 26.7        | 0.22                       | 48  | 0.026                         | 137 | 30.7          | 22                | Schmidt-Nielsen <i>et al.</i> (1966)                 |
| <i>Ornithorhynchus anatinus</i> | 693           | 18.2        | 0.28                       | 42  | 0.030                         | 79  | 34.0          | —                 | ¶                                                    |
| <i>Marmosa muritorius</i>       | 13            | 6.5         | 1.44                       | 80  | 0.26                          | 93  | 33.2          | 27                | ¶c                                                   |
| <i>Didelphis marsupialis</i>    | 1000          | 20.1        | 0.52                       | 85  | 0.054                         | 169 | 35.0          | 25                | ¶                                                    |
| <i>Cercartus nanus</i>          | 70            | 10.1        | 0.85                       | 72  | 0.14                          | 118 | 35.6          | 31                | ¶                                                    |
| <i>Sorex cinereus</i>           | 3.3           | 4.6         | 7.0                        | 280 | 0.54                          | 98  | 38.8          | 23                | Morrison <i>et al.</i> (1959)                        |
| <i>Aolus trivirgatus</i>        | 625           | 17.7        | 0.45                       | 66  | 0.031                         | 82  | 38.0          | 23                | Morrison & Simões (1962)                             |
| <i>Cyclodes didactylus</i>      | 185           | 13.0        | 0.58                       | 63  | 0.070                         | 95  | 32.5          | —                 | McNab, unpublished                                   |
| <i>Bradypus</i> sp.             | 2600          | 25.7        | 0.18                       | 38  | 0.024                         | 120 | 33.0          | —                 | ¶                                                    |
| <i>Choloepus hoffmanni</i>      | 3770          | 28.3        | 0.16                       | 37  | 0.018                         | 113 | 34.4          | —                 | ¶                                                    |
| <i>Dasybus novemcinctus</i>     | 3700          | 28.2        | 0.25                       | 57  | 0.027                         | 155 | 34.5          | —                 | ¶                                                    |
| <i>Vulpes vulpes</i>            | 4440          | 29.6        | 0.55                       | 134 | 0.018                         | 124 | 38.7          | 8                 | Irving & Krog (1954),<br>Irving <i>et al.</i> (1955) |
| <i>Canis familiaris</i>         | 6666          | 36.2        | 0.34                       | 100 | 0.022                         | 244 | 37.8          | —                 | Hellstrom & Hammel (1967)                            |
| <i>Tamiasciurus hudsonicus</i>  | 229           | 13.5        | 1.50                       | 172 | 0.086                         | 134 | 40.0          | 20                | Irving & Krog (1954),<br>Irving <i>et al.</i> (1955) |
| <i>Geomys pinetis</i>           | 203           | 13.3        | 0.74                       | 81  | 0.075                         | 107 | 36.1          | 25                | ¶c                                                   |
| <i>Dipodomys merriami</i>       | 38            | 8.6         | 1.13                       | 83  | 0.11                          | 65  | 37.0          | 27                | Carpenter (1966)                                     |
| <i>D. agilis</i>                | 61            | 9.7         | 1.05                       | 86  | 0.073                         | 56  | 37.0          | 28                | Carpenter (1966)                                     |
| <i>Peromyscus eremicus</i>      | 22            | 7.4         | 1.48                       | 94  | 0.16                          | 74  | 36.1          | 30                | ¶c                                                   |
| <i>P. californicus</i>          | 46            | 9.0         | 1.03                       | 81  | 0.11                          | 74  | 35.9          | 28                | ¶c                                                   |
| <i>P. eremicus</i>              | 16            | 6.9         | 1.58                       | 92  | 0.19                          | 76  | 36.8          | 29                | ¶c                                                   |
| <i>P. maniculatus</i>           | 24            | 7.6         | 1.67                       | 110 | 0.17                          | 84  | 37.6          | 29                | ¶c                                                   |
| <i>P. truei</i>                 | 33            | 8.3         | 1.53                       | 109 | 0.14                          | 80  | 37.4          | 27                | ¶c                                                   |
| <i>Neotoma lepida</i>           | 110           | 11.3        | 0.79                       | 76  | 0.070                         | 74  | 36.8          | 26                | ¶c                                                   |
| <i>N. fuscipes</i>              | 187           | 13.0        | 0.79                       | 91  | 0.059                         | 81  | 36.6          | 23                | ¶c                                                   |
| <i>Microtus montanus</i>        | 31            | 8.1         | 2.65                       | 185 | 0.19                          | 106 | 37.8          | 26                | Packard (1968)                                       |
| <i>Spalax leucodon</i>          | 208           | 13.4        | 0.79                       | 89  | 0.068                         | 101 | 37.0          | 25                | ¶c                                                   |
| <i>Tachyoryctes splendens</i>   | 234           | 13.8        | 0.79                       | 90  | 0.073                         | 112 | 36.2          | 27                | ¶c                                                   |



Table 1 *cont.*

| Species                      | Weight<br>(g) | Basal metabolism           |     | Conductance                   |     | $T_b$<br>(°C) | $T_{ill}$<br>(°C) | References¶                                          |
|------------------------------|---------------|----------------------------|-----|-------------------------------|-----|---------------|-------------------|------------------------------------------------------|
|                              |               | (c.c. O <sub>2</sub> /g-h) | %†  | (c.c. O <sub>2</sub> /g-h °C) | %‡  |               |                   |                                                      |
| <i>Erethizon dorsatum</i>    | 5530          | 31.3                       | 103 | 0.015                         | 116 | 37.4          | 7                 | Irving & Krog (1954),<br>Irving <i>et al.</i> (1955) |
| <i>Heliothobius kapeti</i>   | 89            | 10.7                       | 91  | 0.13                          | 121 | 35.0          | 28                | ¶c                                                   |
| <i>Heterocephalus glaber</i> | 39            | 8.6                        | 56  | 0.45                          | 281 | 29.4          | —                 | ¶c ( $T_b$ at $T_a = 20$ to 25 °C)                   |
| <i>Lepus americanus</i>      | 1581          | 22.6                       | 178 | 0.029                         | 121 | 39.8          | 10                | Hart <i>et al.</i> (1965)                            |
| <i>L. alleni</i>             | 3000          | 26.7                       | 120 | 0.029                         | 153 | 37.9          | 20                | Dawson & Schmidt-Nielsen (1966)                      |
| <i>L. californicus</i>       | 2300          | 24.9                       | 119 | 0.021                         | 105 | 39.2          | 14                | Schmidt-Nielsen <i>et al.</i> (1965)                 |
| <i>Heterohyrax brucei</i>    | 2000          | 24.0                       | 71  | 0.028                         | 133 | 36.7          | 24                | Taylor & Sale (1960)                                 |
| <i>Procavia capensis</i>     | 2630          | 25.8                       | 88  | 0.020                         | 111 | 38.0          | 15                | Taylor & Sale (1960)                                 |
| <i>P. johnstoni</i>          | 2750          | 26.1                       | 96  | 0.016                         | 89  | 38.8          | 10                | Taylor & Sale (1960)                                 |
| <i>Sus scrofa</i>            | 48000         | 54.9                       | 152 | 0.035                         | 243 | 38.4          | 4                 | Irving (1956); Irving <i>et al.</i> (1955, 1956)     |
| <i>Taurotragus oryx</i>      | 150000        | 74.6                       | 141 | 0.016                         | 615 | 36.6          | 24                | Taylor & Lyman (1967)                                |

\*  $(M_b/C)_a = 3.33W^{0.75}$ .†  $M_b$  (%) = 100 mean/ $3.4W^{-0.75}$ .‡  $C$  (%) = 100 mean/ $1.02W^{-0.81}$ .§  $(M_b/C)_r = M_b$  (%) /  $C$  (%).||  $T_1$  = lower limit of thermoneutrality.¶ Indicates that references are found in Table IV of McNab (1966); c indicates that values for  $M_b$  have been corrected to mean values.

that the mean minimal rate of metabolism measured in *Sorex* was equal to  $1.4 M_b$ , due to the specific dynamic action of protein metabolism). Small shrews are near the lower limit of weight for continuous homoiothermy. Animals of still smaller weights are theoretically capable of continuous homoiothermy, but apparently it is prohibitively expensive. For example, a mammal weighing 0.25 g requires a ratio  $(M_b/C)_r$  equal to about 4.9 for  $T_b$  to be independent of weight. The intermittently endothermic sphinx moth (*Celerio*, thorax weight = 0.25 g) has  $(M_b/C)_r$  equal to 0.6, only 12% of the expenditure needed for continuous homoiothermy (Heath & Adams, 1967). As a result this moth can thermoregulate only with the high heat production associated with wing movements; during quiescent periods the moth is poikilothermic.

In the evolution of a small weight, then, an endotherm has two alternatives: (1) to maintain the relative levels of  $M_b$  and  $C$ , as may well be dictated by its habits and its environment, and suffer a reduction in the level and precision of thermoregulation, or (2) maintain thermoregulation by means of a compensatory increase in the relative rate of metabolism, or a compensatory decrease in the relative conductance. It appears that the second 'choice' is utilized whenever energetically (that is, ecologically) feasible (e.g. McNab, 1969).

It is of interest at this point to examine the constant appearing in equation (5). First, let us consider the behaviour of  $K$  within a group of mammals, such as bats, rodents or edentates. Graphically,  $K$ , represents the level of  $T_b$  when  $(M_b/C)_e = 0.0$ . (Fig. 2A). It also represents the lower limit of thermoneutrality,  $T_l$ , since that is the environmental temperature at which the basal rate of metabolism intersects the curve whose slope is the minimal thermal conductance. One may ask how  $T_l$  is influenced by the ratio  $(M_b/C)_r$  and by body weight. The effect depends upon whether or not body temperature is independent of weight. According to Newton's law,  $T_l = T_b - M_b/C$ . If body temperature depends upon weight, equation (5a) may be applied:

$$\begin{aligned} T_l &= (M_b/C)_r(M_b/C)_e + K - M_b/C \\ &= M_b/C + K - M_b/C \\ &= K, \end{aligned} \quad (7)$$

that is, the lower limit of thermoneutrality should be independent of weight and of the relative ratio  $(M_b/C)_r$ . If, however,  $T_b$  is dependent of weight, then from equation (5b)

$$T_l = T_b - 3.33(M_b/C)_r W^{0.28}; \quad (8)$$

$T_l$  should decrease as each weight and  $(M_b/C)_r$  increases.

Data on the lower limit of thermoneutrality in mammals (Table 1) are plotted in Fig. 5 as a function of weight. Clearly the variation in  $T_l$ , whether found among species or seasonally within species, conforms to the predictions of equations (7) and (8).

There is another source of variation inherent in  $K$ . It will be noticed in Figs. 2B and 3 that the curves below the 'critical' weight, although similar in form in the various groups of mammals, do not extrapolate to a common  $K$ ;  $K$  is higher in bats than in monotremes and edentates (Fig. 6a). And  $K$  is even higher in Australian marsupials. It should be re-emphasized that the analysis used above accounts for variations in the size of the temperature differential  $T_b - K = T_b - T_l$  and will account for  $T_b$

only when  $K$  is equal in all mammals. This is shown in Fig. 6B by the fact that much of the variation in  $T_b$  among the mammals in Fig. 6A disappears when the differential  $T_b - T_l$  is used. In this case the differential approaches 0.0 as either  $(M_b/C)_r$  or  $(M_b/C)_e$  approaches 0.0. Therefore, the variation of  $K$  represents a variation in the

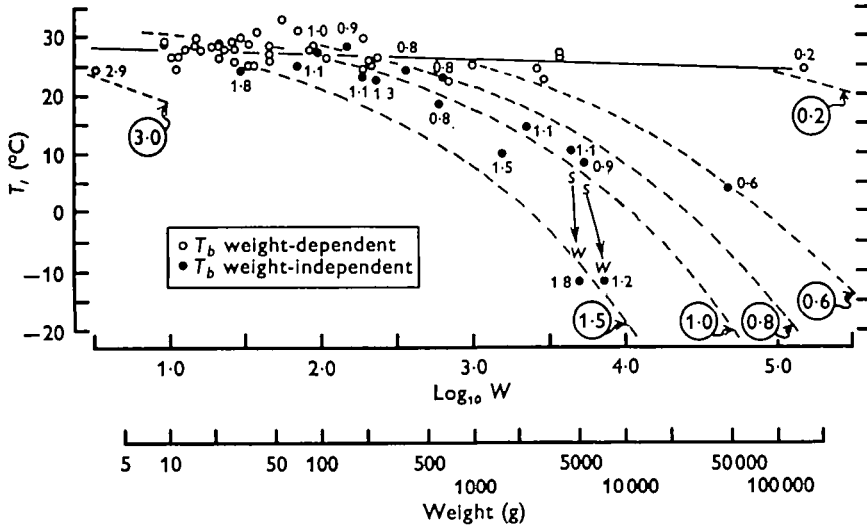

Fig. 5. The lower limit of thermoneutrality,  $T_l$ , in mammals as a function of body weight (data from Table 1). Numbers near solid points indicate values for  $(M_b/C)_r$ . Dotted curves expected from equation (8) for given values of  $(M_b/C)_r$ .  $S$  and  $W$  refer to summer and winter values, respectively.

Table 2. Variation in the set point of body temperature in bats as a function of food habits and distribution in South America

| Species                       | $z^*$<br>(°C) | Distribution |          |       | Food habits†  |       |
|-------------------------------|---------------|--------------|----------|-------|---------------|-------|
|                               |               | Trop.        | Marginal | Temp. | Type          | Range |
| <i>Rhinophylla pumilio</i>    | 7.2           | ×            | —        | —     | Fruit         | N?    |
| <i>Desmodus rotundus</i>      | 6.6           | ×            | ×        | —     | Blood         | B     |
| <i>Glossophaga soricina</i>   | 6.5           | ×            | —        | —     | Nectar, fruit | B     |
| <i>Uroderma bilobatum</i>     | 6.4           | ×            | —        | —     | Fruit         | B?    |
| <i>Noctilio labialis</i>      | 5.9           | ×            | —        | —     | Insects       | B     |
| <i>Carollia perspicillata</i> | 5.9           | ×            | —        | —     | Fruit         | B     |
| <i>Molossus molossus</i>      | 5.9           | ×            | ×        | —     | Insects       | B     |
| <i>Eumops perotis</i>         | 5.7           | ×            | —        | —     | Insects       | B     |
| <i>Phyllostomus discolor</i>  | 5.6           | ×            | —        | —     | Fruit, meat   | B     |
| <i>Artibeus concolor</i>      | 5.6           | ×            | —        | —     | Fruit         | B?    |
| <i>Noctilio leporinus</i>     | 5.2           | ×            | ×        | —     | Fish, insects | B?    |
| <i>Vampyrops lineatus</i>     | 4.9           | ×            | —        | —     | Fruit         | B     |
| <i>Tonatia bidens</i>         | 4.7           | ×            | —        | —     | Meat          | B     |
| <i>Phyllostomus hastatus</i>  | 4.6           | ×            | —        | —     | Meat, fruit   | B     |
| <i>Sturnira lilium</i>        | 4.5           | ×            | ×        | —?    | Fruit         | B     |
| <i>Artibeus jamaicensis</i>   | 4.2           | ×            | ×        | —     | Fruit         | B     |
| <i>Histiotus velatus</i>      | 4.2           | ?            | ×        | ×     | Insects       | B     |
| <i>Anoura caudifer</i>        | 4.0           | ×            | —        | —     | Nectar        | N?    |
| <i>Diphylla ecaudata</i>      | 3.9           | ×            | —        | —     | Blood         | N     |
| <i>Diaemus youngi</i>         | 3.2           | ×            | —        | —     | Blood         | N     |

\*  $z = T_b - (M_b/C) - 22.2$ .

† Range of foods used within a food type either broad (B) or narrow (N).

placement of the differential along a temperature axis and not in the ability of  $M_b/C$  to predict the size of the differential.

If there is significance in the variation of  $K$ , it should follow some meaningful pattern. The search for such a pattern is facilitated by substituting  $T_0 + x$  for  $K$ , where  $T_0$  is the lowest limit of thermoneutrality for any mammal whose  $T_b$  depends upon  $(M_b/C)_e$  (here equal to  $22.2^\circ\text{C}$  in *Tachyglossus*), and  $x$  is the difference between the actual  $T_l$  for a particular species and  $T_0$ . The range of  $x$ , then, is a measure of the

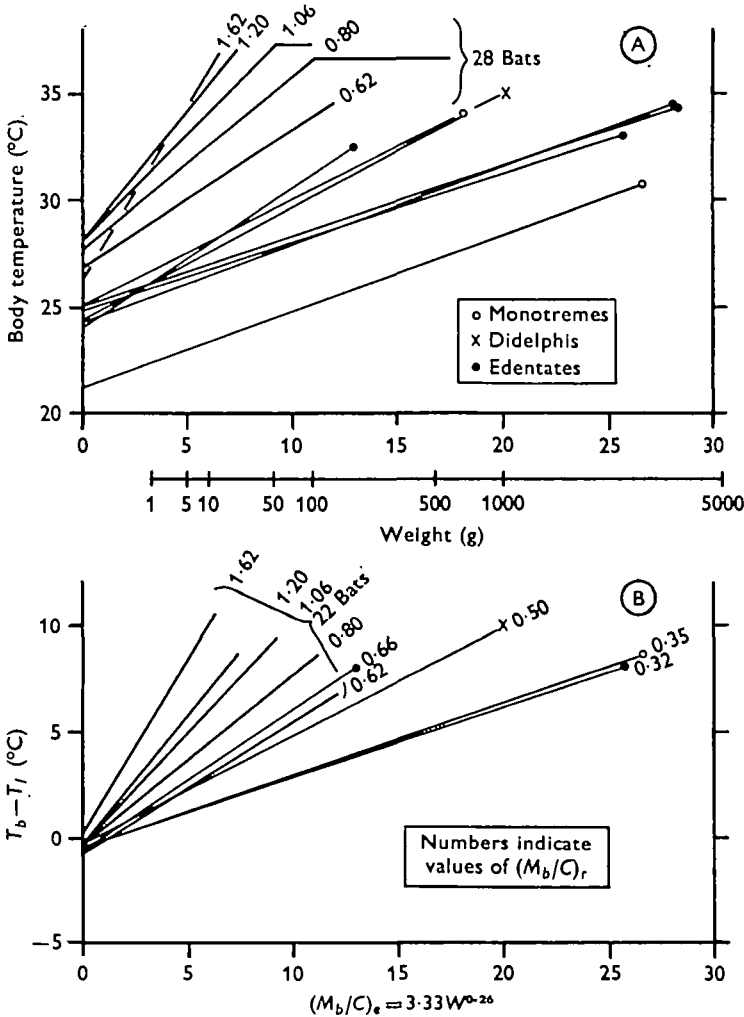

Fig. 6. A. Body temperature in selected mammals as a function of  $(M_b/C)_r$  and  $(M_b/C)_e$ . B. The temperature differential between the body and the environment at the lower limit of thermoneutrality as a function of  $(M_b/C)_r$  and  $(M_b/C)_e$ .

flexibility of the set point of body temperature independent of the influence of  $W$ ,  $M_b$ , and  $C$ . Of two mammals having the same weight, basal rate of metabolism, and conductance, the species with the highest set point for temperature regulation, that is with the largest  $x$ , will have a higher rate of metabolism at all ambient temperatures below the lower limit of thermoneutrality of the warmer species. One may therefore

expect that mammals that live in cold climates or that have unusually narrow food habits might have small values for  $z$ , since this may be a means of reducing energy expenditure at a fixed weight without sacrificing the effectiveness of thermoregulation. These conclusions agree with the data on bats (Table 2). Furthermore, *Didelphis* has the lowest  $z$  for known marsupials, and it has moved farther into the temperate zone than any other marsupial; *Sorex* has a low  $z$ , which insures that its rate of metabolism is less than it would be for a mammal of its size with a large  $z$ ; and  $z$  is small in edentates and monotremes, tropical mammals with specialized food habits. Body temperature thus seems to be capable of some variation independent of  $M_b$ ,  $C$  and  $W$  in a manner adaptive to the climate. It is not clear what sets the limits of variation in  $z$ .

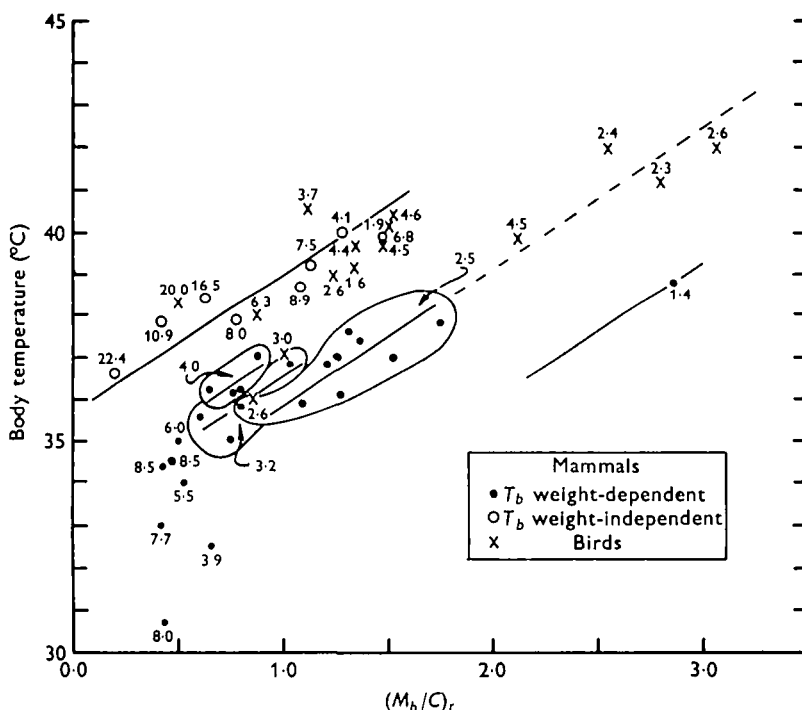

Fig. 7. The influence of  $(M_b/C)_r$  on body temperature in mammals and birds (data from Tables 1 and 2). All values of  $(M_b/C)_r$  for both birds and mammals use  $(M_b/C)_s = 3.33W^{0.26}$  as a standard. Numbers on graph indicate  $W^{0.26}$ .

Beyond the 'critical' weight, body temperature is influenced by the ratio  $(M_b/C)_r$ . One can expect from equation (5b) that the slope of the curve of body temperature on the relative ratio would be equal to 3.33, irrespective of weight, since variation in  $W^{0.26}$  is compensated for by variation in  $T_l$ . The same relationship between  $T_b$  and  $(M_b/C)_r$  should also exist when  $T_b$  depends upon  $(M_b/C)_e$ , provided that weight and  $z$  are constant. Both of these expectations generally hold (Fig. 7), except at some low values for  $(M_b/C)_r$ , where there is variation in  $z$ .

Since a large weight can compensate for a low ratio  $(M_b/C)_r$  in the maintenance of precise thermoregulation, large mammals tend to have lower ratios  $(M_b/C)_r$  (Fig. 1) and therefore lower body temperatures than species of an intermediate size (Figs. 2B

and 3). This trend raises the possibility that the largest of mammals, the pachyderms and cetaceans, have even lower relative ratios and temperatures. One can conclude from Fig. 7 that  $T_b$  in mammals whose temperature is independent of  $(M_b/C)_e$  should approach  $35.7^\circ\text{C}$  as  $(M_b/C)_r$  approaches 0.0 and weight becomes infinitely large. Unfortunately, there are no adequate measurements of the energetics of large mammals; it is even difficult to obtain reliable measurements of their body temperatures.

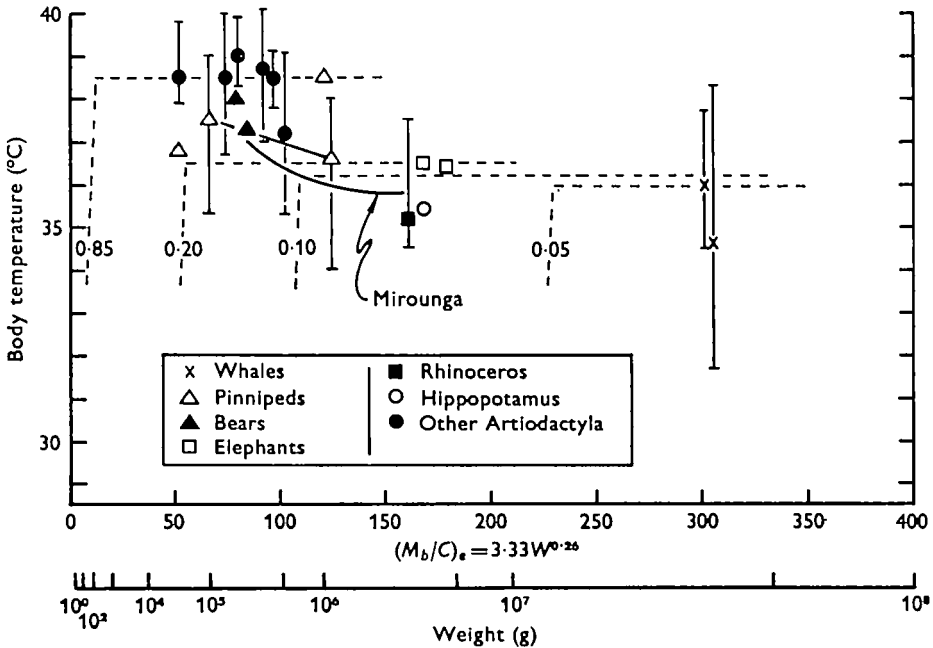

Fig. 8. Body temperatures in large mammals as a function of body weight. Dashed curves are for  $T_b$  when  $(M_b/C)_r$  is constant. The data (mean  $\pm$  ranges) were taken from Allbrook *et al.* (1958), Bartholomew (1954), Benedict (1935), Bligh & Harthoorn (1965), Bligh *et al.* (1965), Buss & Wallner (1965), Irving & Krog (1954), Luck & Wright (1959), Morrison (1962), and Ray & Fay (1968).

The few data indicate a continuing decrease in temperature with an increase in weight, an asymptote in accord with the argument above occurring near  $36^\circ\text{C}$  (Fig. 8). The decrease in temperature with an increase in weight occurs intraspecifically both in the walrus (*Odobenus rosmarus*; Ray & Fay, 1968) and in the northern elephant seal (*Mirounga angustirostris*; Bartholomew, 1954).

It is clear from this discussion that the parameters  $T_b$ ,  $T_l$ ,  $M_b$ ,  $C$ , and  $W$  have interrelations that are consistent with the Newtonian model of thermoregulation proposed by Scholander and Irving. It may also be tentatively concluded that the level of temperature regulation in mammals is determined in the following manner:

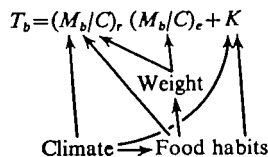

## THE THERMOREGULATION OF BIRDS

Birds usually have higher resting temperatures than mammals; this has been explained as due to the high basal rates of metabolism and low thermal conductances of birds (McNab, 1966*a*). Two problems with this explanation have since arisen. One is that the higher level of metabolism in birds has been questioned by Lasiewski & Dawson (1967) and the lower conductances disputed by Herreid and Kessel (1967). Secondly, it remains to be determined what effect bringing weight into the analysis of mammalian temperatures has upon the conclusion that bird temperatures are determined in the same manner as those of mammals.

Lasiewski & Dawson (1967) suggest on the basis of energetics that birds can best be broken into two groups, passerines and non-passerines, the curve of metabolism on weight for each having an exponent similar to that of mammals and differing each from the other and from mammals only by a coefficient. Without doubt marked

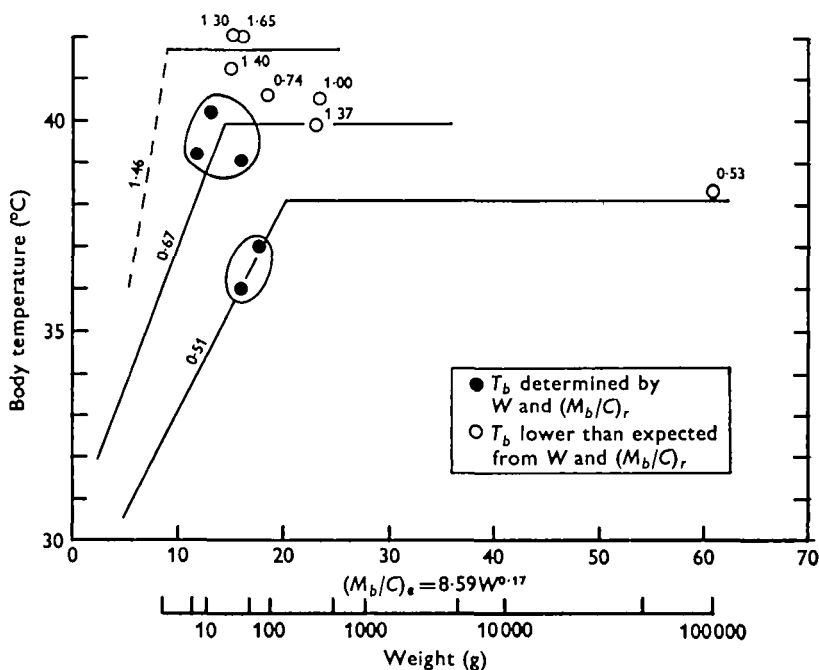

Fig. 9. Body temperature in birds as a function of the ratios  $(M_b/C)_r$  and  $(M_b/C)_s$ . Data from Table 3.

differences exist among birds, but one could as well divide birds into familial or generic groups (e.g. Zar, 1968). How animals are divided into categories depends upon the questions being asked, not simply upon whether one can find statistically significant differences. Thus, one may be interested in the differences existing between homoiotherms and poikilotherms, as was Hemmingsen (1960), who combined mammals and birds into one equation. Or, one may be interested in the differences existing between mammals and birds (King & Farner, 1961; McNab, 1966*a*). Each of these viewpoints is legitimate.

Herreid & Kessel (1967) measured cooling constants for dead birds from which they calculated thermal conductances; they also summarized the data available in the literature on the conductances of live mammals. They concluded that there is no difference between the conductances of mammals and birds. However, conductances measured on live animals and those calculated from the cooling curves of dead individuals often do not give identical results (e.g. McNab & Morrison, 1963), which may have obscured any inequality in conductance occurring between birds and mammals. This suggestion is borne out by Lasiewski, Weathers & Bernstein (1967), who described an equation for the conductances of live birds as a function of weight that is identical in the exponent to that of Herreid and Kessel for mammals, differing only in the coefficient, which is 17% less than that for mammals. Thus, birds do in fact have lower conductances than mammals of the same weight.

The question remains whether these differences are sufficient to account for the higher temperatures of birds, especially given the effect of weight in mammals. That is, if a mammal of a given weight had the rate of metabolism and conductance of a bird of the same weight, would the mammal have the same temperature as the bird? Or do mammals operate at lower temperatures than birds for reasons other than those of  $M_b$  and  $C$ ? Unfortunately, there are very few complete sets of data on birds.

The expected ratio  $(M_b/C)_e$  for birds is equal to  $(7.3W^{-0.34})/(0.85W^{-0.51}) = 8.59W^{0.17}$  (McNab, 1966a; Lasiewski *et al.* 1967). Therefore, if the analysis described for mammals works for birds as well,  $T_b$  should be given by

$$T_b = 8.59(M_b/C)_r W^{0.17} + K. \quad (9)$$

Since  $8.59W^{0.17} = (2.58W^{-0.09})(3.33W^{0.26})$ , the ratio  $(M_b/C)_r$  in birds is equal to  $2.58W^{-0.09}$  times that of mammals, which will insure that the temperatures of small birds will be appreciably higher than those of mammals of the same weight.

The body temperatures of birds are plotted in Fig. 9 as a function of  $8.59W^{0.17}$  (data from the literature, see Table 3): there is an acceptable agreement between the temperatures measured in birds and the parameters of  $(M_b/C)_r$  and  $W^{0.26}$ . Furthermore, the interactions that exist between  $T_b$ ,  $(M_b/C)_r$ , and  $W^{0.26}$  in these birds are similar to those found in mammals (Fig. 7), the major difference between these groups being that birds have higher values for the ratio  $(M_b/C)_r$ . But an important point must be made here: in spite of the many comparative studies on the metabolism of birds, *most of these data have little or no value in studies of the energetics of temperature regulation because body temperatures corresponding to the rates of metabolism were not reported*. This deficiency is very important, since conductance cannot be evaluated without  $T_b$ , especially when a bird's response to a change in  $T_a$  involves both  $M$  and  $C$ . To interpret rates of metabolism in terms of temperature regulation, one must have at least the following data: (1)  $W$ , (2)  $T_a$ , (3)  $T_b$ , and (4) the animal's activity.

Obviously, more complete data on the energetics of birds are required over a large weight range. Nevertheless, one can tentatively conclude that temperature regulation in birds is determined as it is in mammals; the differences in body temperature between these groups are primarily due to differences in  $M_b$  and  $C$ . The variation of  $M_b$  and  $C$  among birds depends upon their body weight and the conditions existing in their normal environments (Fig. 1).



Table 3. *The energetics of birds*

| Species                        | Weight<br>(g) | Basal metabolism           |     | Conductance                   |     | $(M_b/C)_s$ § | $T_b$<br>(°C) | References                                       |
|--------------------------------|---------------|----------------------------|-----|-------------------------------|-----|---------------|---------------|--------------------------------------------------|
|                                |               | (c.c. O <sub>2</sub> /g-h) | %†  | (c.c. O <sub>2</sub> /g-h °C) | %‡  |               |               |                                                  |
| <i>Struthio camelus</i>        | 100 000       | 60.8                       | 185 | 0.0083                        | 346 | 0.53          | 38.3          | Crawford & Schmidt-Nielsen (1967)                |
| <i>Ardeola ibis</i>            | 350           | 23.3                       | —   | —                             | —   | 1.00          | 40.5          | Sigfried (1968)                                  |
| <i>Lagopus leucurus</i>        | 326           | 22.9                       | 127 | 0.041                         | 93  | 1.37          | 39.9          | Johnson (1968)                                   |
| <i>Lophortyx californicus</i>  | 139           | 18.4                       | 74  | 0.069                         | 100 | 0.74          | 40.6          | Brush (1965)                                     |
| <i>Scardafella inca</i>        | 40.5          | 16.1                       | 56  | 0.11                          | 85  | 0.66          | 39.0          | MacMillen & Trost (1967)                         |
| <i>Phalaenoptilus nuttalli</i> | 40            | 16.1                       | 38  | 0.11                          | 85  | 0.45          | 36.0          | Bartholomew <i>et al.</i> (1962); Brauner (1952) |
| <i>Chordeiles minor</i>        | 70            | 17.7                       | 110 | 0.11                          | 110 | 0.58          | 37.0          | Lasiewski & Dawson (1964)                        |
| <i>Passer domesticus</i>       | 25.8          | 14.9                       | 148 | 0.17                          | 106 | 1.40          | 41.2          | Hudson & Kimzey (1966)                           |
| <i>Richmondia cardinalis</i>   | 40            | 16.1                       | 127 | 0.10                          | 77  | 1.65          | 42.0          | Dawson (1958)                                    |
| <i>Estrilda troglodytes</i>    | 6.2           | 11.7                       | 92  | 0.50                          | 152 | 0.61          | 39.2          | Lasiewski <i>et al.</i> (1964)                   |
| <i>Taeniopygia castanotis</i>  | 11.7          | 13.1                       | 104 | 0.34                          | 142 | 0.73          | 40.2          | Calder (1964)                                    |
| <i>Zonotrichia leucophrys</i>  | 28.6          | 15.2                       | 104 | 0.12                          | 80  | 1.30          | 42.0          | King (1964)                                      |

Note. Italicized numbers represent questionable values or values that are poorly substantiated.

•  $(M_b/C)_s = 8.59 W^{0.17}$ .

†  $M_b(\%) = 100 \text{ mean}/7.3 W^{-0.24}$ .

‡  $C(\%) = 100 \text{ mean}/0.85 W^{-0.61}$ .

§  $(M_b/C)_s = M_b(\%)/C(\%)$ .

## SUMMARY

1. The interactions of basal rate of metabolism, thermal conductance, body temperature, lower limit of thermoneutrality, and body weight in mammals are compatible with Newton's law of cooling.

2. A small body weight will normally reduce the level and preciseness of body temperature, but a high basal rate of metabolism or a low thermal conductance may compensate for a small size and permit a high, precise temperature to be maintained.

3. The parameters of energetics that fix the level and preciseness of body temperature in mammals are ultimately correlated in turn with the environmental parameters of climate and food habits.

4. Birds generally have higher temperatures than mammals because the basal rates of metabolism are higher and the conductances lower in birds than in mammals of the same weight.

I should like to thank the many people with whom I have discussed these ideas; special thanks must go to Drs A. Carr, C. Johnson, D. Johnston, and F. Nordlie and to Mr T. Krakauer, all of whom critically read this manuscript. Mr P. Laessle drew the figures for this paper. Finally, I would like to express my thanks to the National Science Foundation (GB-3477) and the American Philosophical Society (Penrose Fund 4225) for sponsoring the research that led to the ideas found within this essay.

## REFERENCES

- ALLBROOK, D. B., HARTHOORN, A. M., LUCK, C. P. & WRIGHT, P. G. (1958). Temperature regulation in the white rhinoceros. *J. Physiol.* **143**, 51-2 P.
- BARTHOLOMEW, G. A. (1954). Body temperature and respiratory and heart rates in the northern elephant seal. *J. Mammal.* **35**, 211-18.
- BARTHOLOMEW, G. A., HUDSON, J. W. & HOWELL, T. R. (1962). Body temperature, oxygen consumption, evaporative water loss, and heart rate in the poor-will. *Condor* **64**, 117-25.
- BENEDICT, F. G. (1935). *The Physiology of the Elephant*. Carnegie Inst. of Wash. Publ. 474. Washington, D.C.
- BLIGH, J. & HARTHOORN, A. M. (1965). Continuous radiotelemetric records of the deep body temperature of some unrestrained African mammals under near-natural conditions. *J. Physiol.* **176**, 145-62.
- BLIGH, J., INGRAM, D. L., KEYNES, R. D. & ROBINSON, S. G. (1965). The deep body temperature of an unrestrained Welsh mountain sheep recorded by a radiotelemetric technique during a 12-month period. *J. Physiol.* **176**, 136-44.
- BRAUNER, J. (1952). Reactions of poor-wills to light and temperature. *Condor* **54**, 152-9.
- BRUSH, A. H. (1965). Energetics, temperature regulation and circulation in resting, active and defeathered California quail, *Lophortyx californicus*. *Comp. Biochem. Physiol.* **15**, 399-421.
- BUSS, I. O. & WALLNER, A. (1965). Body temperature of the African elephant. *J. Mammal.* **46**, 104-7.
- CALDER, W. A. (1964). Gaseous metabolism and water relations of the zebra finch, *Taeniopygia castanotis*. *Physiol. Zool.* **37**, 400-13.
- CALDER, W. A. & SCHMIDT-NIELSEN, K. (1967). Temperature regulation and evaporation in the pigeon and the roadrunner. *Am. J. Physiol.* **213**, 883-9.
- CARPENTER, R. E. (1966). A comparison of thermoregulation and water metabolism in the kangaroo rats *Dipodomys agilis* and *Dipodomys merriami*. *Univ. Calif. Pub. Zool.* **78**, 1-36.
- DAWSON, T. J. & SCHMIDT-NIELSEN, K. (1966). Effect of thermal conductance of water economy in the antelope jack rabbit, *Lepus alleni*. *J. Cell Physiol.* **67**, 463-72.
- DAWSON, W. R. (1958). Relation of oxygen consumption and evaporative water loss to temperature in the cardinal. *Physiol. Zool.* **31**, 37-47.
- HART, J., POHL, S. H. & TENER, J. S. (1965). Seasonal acclimation in varying hare (*Lepus americanus*). *Can. J. Zool.* **43**, 731-44.

- HEATH, J. E. & ADAMS, P. A. (1967). Regulation of heat production by large moths. *J. exp. Biol.* **47**, 21-33.
- HELLSTRÖM, B. & HAMMEL, H. T. (1967). Some characteristics of temperature regulation in the unanesthetized dog. *Am. J. Physiol.* **213**, 547-56.
- HEMMINGSSEN, A. N. (1960). Energy metabolism as related to body size and respiratory surfaces, and its evolution. *Rept. Steno Mem. Hospital* **9**, 1-110.
- HERREID, C. F. II & KESSEL, BRINA. (1967). Thermal conductance in birds and mammals. *Comp. Biochem. Physiol.* **21**, 405-14.
- HUDSON, J. W. & KIMZEY, S. L. (1966). Temperature regulation and metabolic rhythms in populations of the house sparrow, *Passer domesticus*. *Comp. Biochem. Physiol.* **17**, 203-17.
- IRVING, L. (1956). Physiological insulation of swine as bare-skinned mammals. *J. appl. Physiol.* **9**, 414-20.
- IRVING, L. & KROG, J. (1954). The body temperature of arctic and subarctic birds and mammals. *J. appl. Physiol.* **6**, 667-80.
- IRVING, L., KROG, H. & MONSON, M. (1955). The metabolism of some Alaskan animals in winter and summer. *Physiol. Zool.* **28**, 173-85.
- IRVING, L., PEYTON, L. J. & MONSON, M. (1956). Metabolism and insulation of swine as bare-skinned mammals. *J. appl. Physiol.* **9**, 421-6.
- JOHNSON, R. E. (1968). Temperature regulation in the white-tailed ptarmigan, *Lagopus leucurus*. *Comp. Biochem. Physiol.* **24**, 1003-14.
- KENDEIGH, S. C. (1969). Tolerance of cold and Bergmann's rule. *Auk* **86**, 13-25.
- KING, J. R. (1964). Oxygen consumption and body temperature in relation to ambient temperature in the white crowned sparrow. *Comp. Biochem. Physiol.* **12**, 13-24.
- KING, J. R. & FARNER, D. S. (1961). *Energy metabolism, thermoregulation, and body temperature*, p. 215-288. In A. J. Marshall (Ed.), *Biology and Comparative Physiology of Birds*. London: Academic Press.
- KLEIBER, M. (1960). *The Fire of Life*. New York: John Wiley.
- LASIEWSKI, R. C., ACOSTA, A. L. & BERNSTEIN, M. H. (1966). Evaporative water loss in birds. I. Characteristics of the open flow method of determination, and their relation to estimates of thermoregulatory ability. *Comp. Biochem. Physiol.* **19**, 445-7.
- LASIEWSKI, R. C. & DAWSON, W. R. (1964). Physiological responses to temperature in the common nighthawk. *Condor* **66**, 477-90.
- LASIEWSKI, R. C. & DAWSON, W. R. (1967). A re-examination of the relation between standard metabolic rate and body weight in birds. *Condor* **69**, 13-23.
- LASIEWSKI, R. C., HUBBARD, S. H. & MOBERLY, W. R. (1964). Energetic relationships of very small passerine bird. *Condor* **66**, 212-20.
- LASIEWSKI, R. C., WEATHERS, W. W. & BERNSTEIN, M. H. (1967). Physiological responses of the giant hummingbird, *Patagona gigas*. *Comp. Biochem. Physiol.* **23**, 797-813.
- LUCK, C. P. & WRIGHT, P. G. (1959). The body temperature of the hippopotamus. *J. Physiol.* **147**, 53-4 P.
- MACMILLEN, R. E. & NELSON, J. E. (1969). Bioenergetics and body size in dasyurid marsupials. *Am. J. Physiol.* **217**, 1246-51.
- MACMILLEN, R. E. & TROST, C. H. (1967). Thermoregulation and water loss in the Inca dove. *Comp. Biochem. Physiol.* **20**, 263-73.
- MCNAB, B. K. (1966a). An analysis of the body temperatures of birds. *Condor* **68**, 47-55.
- MCNAB, B. K. (1966b). The metabolism of fossorial rodents: a study of convergence. *Ecology* **47**, 712-33.
- MCNAB, B. K. (1969). The economics of temperature regulation in neotropical bats. *Comp. Biochem. Physiol.* **31**, 227-68.
- MCNAB, B. K. & MORRISON, P. R. (1963). Body temperature and metabolism in subspecies of *Peromyscus* from arid and mesic environments. *Ecol. Monographs* **33**, 63-82.
- MORRISON, P. R. (1962). Body temperatures in some Australian mammals. III. Cetacea (Megaptera). *Biol. Bull. mar. biol. Lab. Woods Hole* **123**, 154-69.
- MORRISON, P. R. & RYSER, F. A. (1952). Weight and body temperature in mammals. *Science* **116**, 231-2.
- MORRISON, P. R., RYSER, F. A. & DAWE, A. R. (1959). Studies on the physiology of the masked shrew, *Sorex cinereus*. *Physiol. Zool.* **32**, 256-71.
- MORRISON, P. R. & SIMÕES, J., Jr. (1962). Body temperatures in two Brazilian primates. *Zoologia* (São Paulo) **24**, 167-78.
- PACKARD, G. C. (1968). Oxygen consumption of *Microtus montanus* in relation to ambient temperature. *J. Mammal.* **49**, 215-20.
- PORTER, W. P. & GATES, D. M. (1969). Thermodynamic equilibria of animals with environment. *Ecol. Monographs* **39**, 245-70.
- RAY, C. & FAY, F. H. (1968). Influence of climate on the distribution of walruses, *Odobenus rosmarus* (Linnaeus). II. Evidence from physiological characteristics. *Zoologica* **53**, 19-32.
- RODBARD, S. (1950). Weight and body temperature. *Science* **111**, 465-6.

- SCHIMDT-NIELSEN, K., DAWSON, T. J., HAMMEL, H. T., HINDS, D. & JACKSON, D. C. (1965). The jack rabbit—a study in its desert survival. *Hvalrddets Skrifter* **48**, 125–92.
- SCHIMDT-NIELSEN, K., DAWSON, T. J. & CRAWFORD, E. C., JR. (1966). Temperature regulation in the echidna (*Tachyglossus aculeatus*). *J. Cell Physiol.* **67**, 63–71.
- SCHOLANDER, P. F., WALTERS, V., HOCK, R. & IRVING, L. (1950a). Body insulation of some arctic and tropical mammals and birds. *Biol. Bull. mar. biol. Lab. Woods Hole* **99**, 225–36.
- SCHOLANDER, P. F., HOCK, R., WALTERS, V., JOHNSON, F. & IRVING, L. (1950b). Heat regulation in some arctic and tropical mammals and birds. *Biol. Bull. mar. biol. Lab. Woods Hole* **99**, 237–58.
- SCHOLANDER, P. F., HOCK, R., WALTERS, V. & IRVING, L. (1950c). Adaptation to cold in arctic and tropical mammals and birds in relation to body temperature, insulation, and basal metabolic rate. *Biol. Bull. mar. biol. Lab. Woods Hole* **99**, 259–71.
- SIGFRIED, W. R. (1968). Temperature variation in the cattle egret. *Ostrich* **39**, 150–4.
- TAYLOR, C. R. & LYMAN, C. P. (1967). A comparative study of the environmental physiology of an East African antelope, the eland, and the Hereford steer. *Physiol. Zool.* **40**, 280–95.
- TAYLOR, C. R. & SALE, J. B. (1969). Temperature regulation in the hyrax. *Comp. Biochem. Physiol.* **31**, 903–7.
- TUCKER, V. (1965). Oxygen consumption, thermal conductance, and torpor in the California Pocket Mouse *Perognathus californicus*. *J. cell. comp. Physiol.* **65**, 393–404.
- ZAR, J. H. (1968). Standard metabolism comparison between orders of birds. *Condor* **70**, 278.

### Table of Symbols

| Symbol     | Factor                                                | Units                                                            |
|------------|-------------------------------------------------------|------------------------------------------------------------------|
| $A$        | Surface area                                          | cm <sup>2</sup>                                                  |
| $C$        | Thermal conductance<br>(coefficient of heat transfer) | c.c. O <sub>2</sub> /g-h °C, or cal/h °C                         |
| $c_1, c_2$ | Thermal coefficients                                  | c.c. O <sub>2</sub> /g-h °C, or cal/h °C                         |
| $h$        | Convective coefficient                                | cal/cm <sup>2</sup> -h °K                                        |
| $K$        | Temperature constant                                  | °C                                                               |
| $k$        | Conductive coefficient                                | cal/cm <sup>2</sup> -h °K                                        |
| $L$        | Heat of vaporization                                  | (c. 540) cal/g H <sub>2</sub> O                                  |
| $M$        | Rate of metabolism                                    | c.c. O <sub>2</sub> /g-h, or cal/h                               |
| $M_b$      | Basal rate of metabolism                              | c.c. O <sub>2</sub> /g-h, or cal/h                               |
| $Q$        | Heat                                                  | cal                                                              |
| $s$        | Specific heat                                         | cal/g °C                                                         |
| $T_a$      | Ambient temperature                                   | °C, or °K                                                        |
| $T_b$      | Body (core) temperature                               | °C, or °K                                                        |
| $T_l$      | Lower limit of thermoneutrality                       | °C                                                               |
| $T_0$      | Temperature constant                                  | °C                                                               |
| $t$        | Time                                                  | h                                                                |
| $W$        | Body weight                                           | g                                                                |
| $w$        | Rate of water loss                                    | g H <sub>2</sub> O/h                                             |
| $x$        | Temperature constant                                  | °C                                                               |
| $\epsilon$ | Emissivity                                            | None                                                             |
| $\phi$     | Cooling constant                                      | 1/h                                                              |
| $\sigma$   | Stefan-Boltzmann constant                             | (4.88 × 10 <sup>-8</sup> ) cal/cm <sup>2</sup> h °K <sup>4</sup> |
